# Supplementary material for: Modification of Polyvinyl Chloride Composites for Radiographic Detection of Polyvinyl Chloride Retained Surgical Items
Source: MDPI journal article supplement (doi:10.3390/polym15030587), 2023-01-23
Supplement: s1 [file s1]

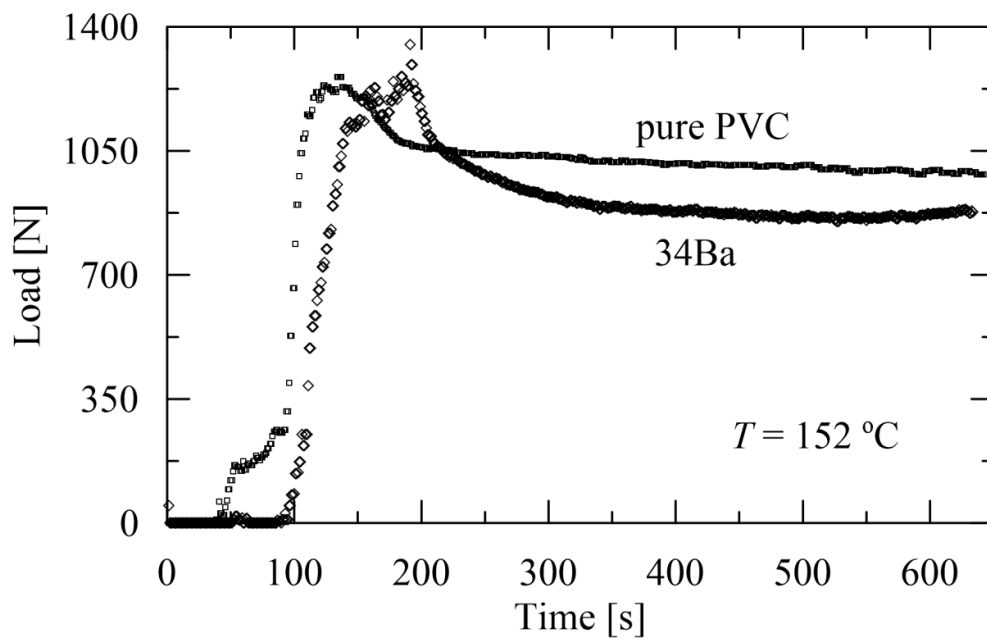

**Figure S1.** Load in dependence on time for pure PVC and the highest filler loading 34Ba.

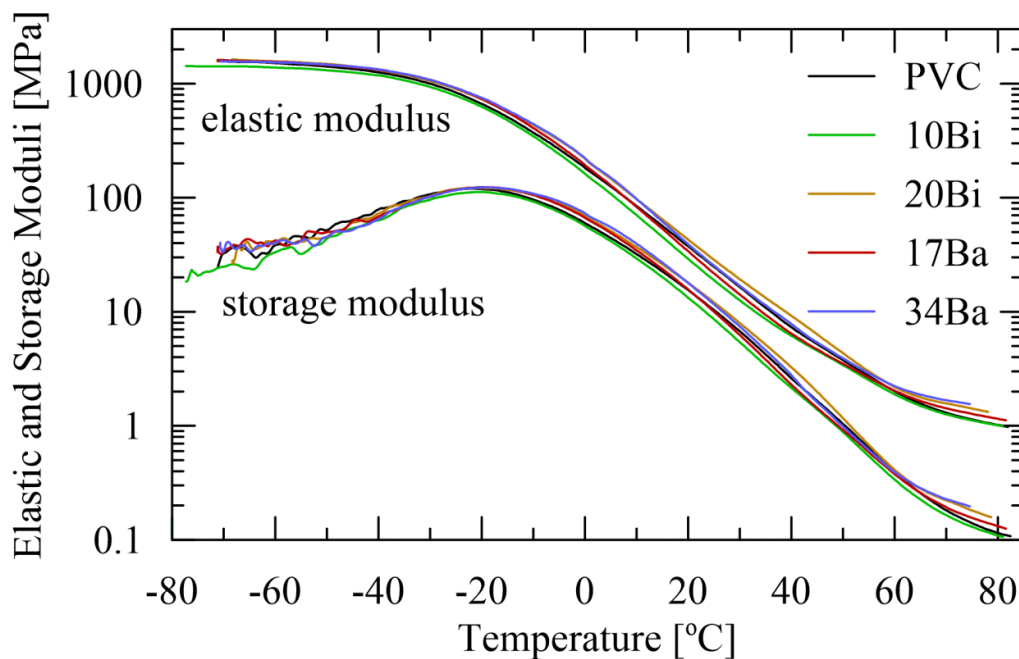

**Figure S2.** A comparison of viscoelastic behaviour of pure PVC and all four compounds.

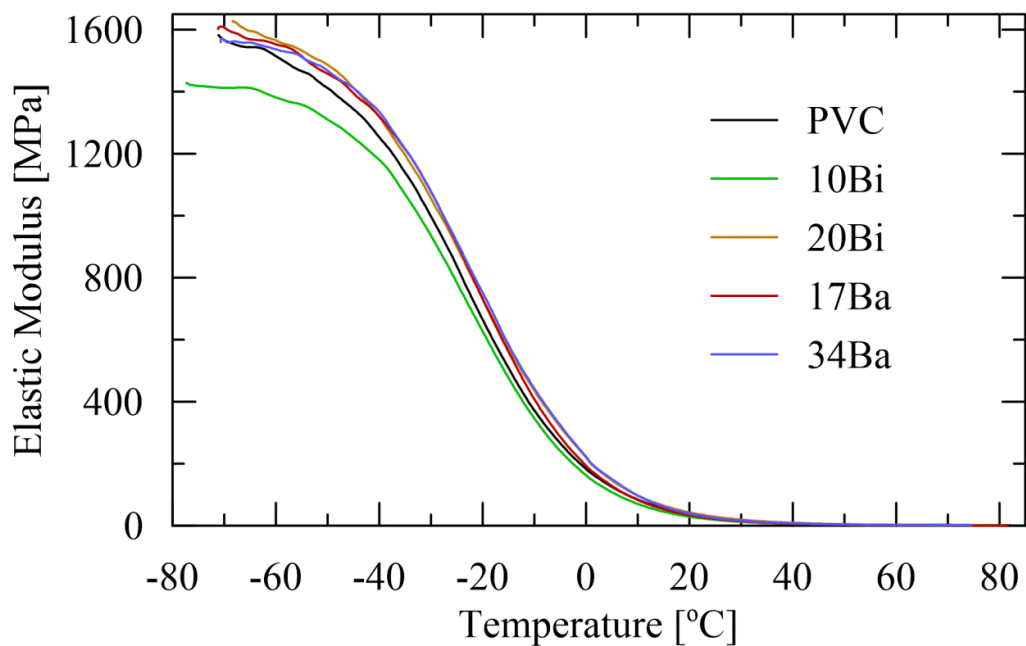

**Figure S3.** A comparison of elastic moduli of pure PVC and all four compounds.

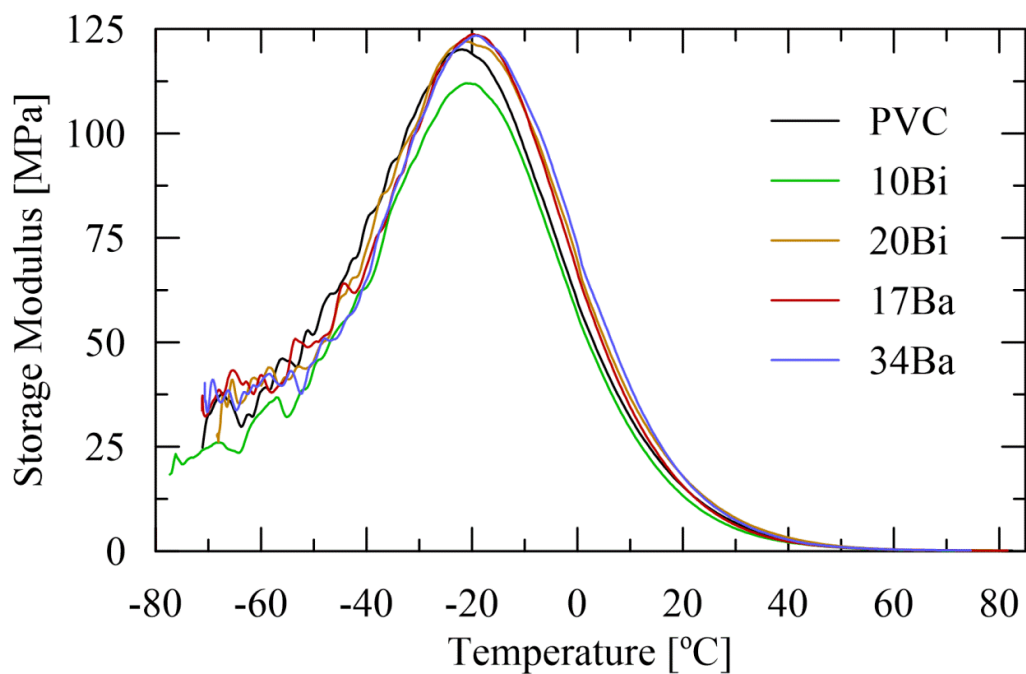

**Figure S4.** A comparison of storage moduli of pure PVC and all four compounds.

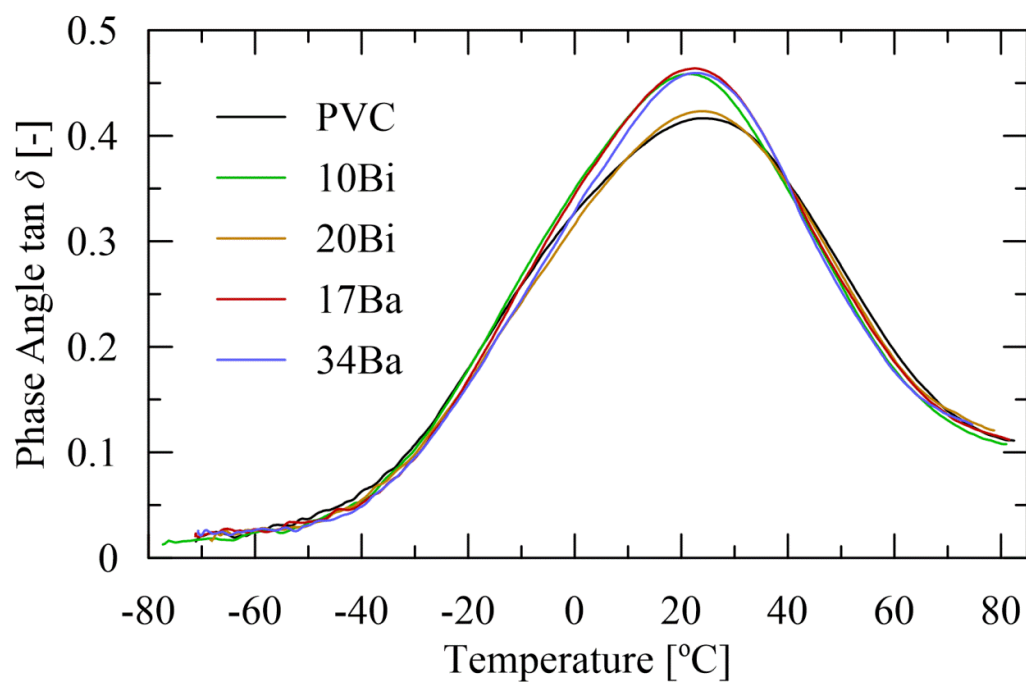

**Figure S5.** A comparison of phase angles  $\tan \delta$  of pure PVC and all four compounds.
